# Supplementary material for: Fibroblast Growth Factor 23 Signaling Does Not Increase Inflammation from Pseudomonas aeruginosa Infection in the Cystic Fibrosis Bronchial Epithelium
Source: MDPI journal article supplement (doi:10.3390/medicina59091635), 2023-09-09
Supplement: s1 [file s1]

## Supplemental Figure S1

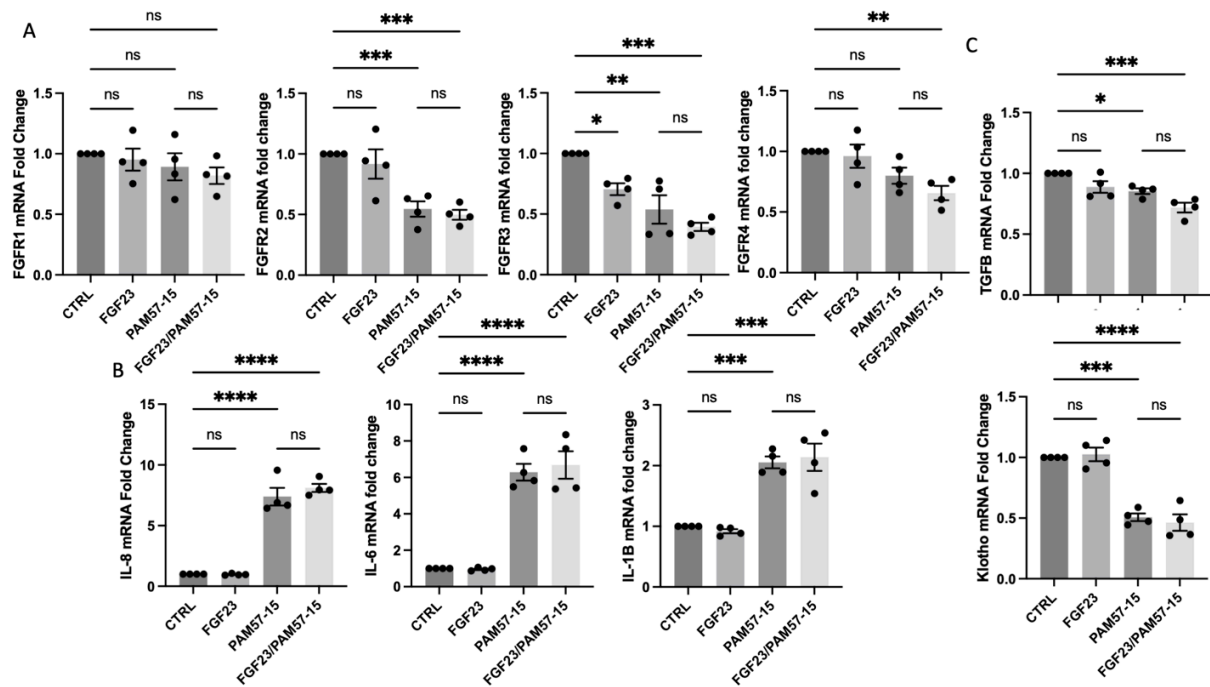

**Supplemental Figure S1.** FGF23 does not exacerbate pro-inflammatory markers at the transcript level in the PA infected 16HBEs. (a) Fold change mRNA levels of FGFRs 1-4 ± FGF23 and PA (PAM57-15). (b) Fold change mRNA levels of CXCL8 (IL-8), IL-6, and IL-1β after treatment ± FGF23 ± PA. (c) Fold change mRNA levels of TGFβ and klotho after treatment ± FGF23 ± PA infection. Data was represented as fold change mRNA expression with n=4 independent experiments. Statistical analysis was done using a 2-way ANOVA, followed by Tukey's multiple comparisons *post hoc* test. Data are expressed as means ± standard error of the mean (SEM). Differences were considered statistically significant if \*P<0.05, \*\*P<0.01, \*\*\*P<0.005, and \*\*\*\*P<0.0001.

## Supplemental Figure S2

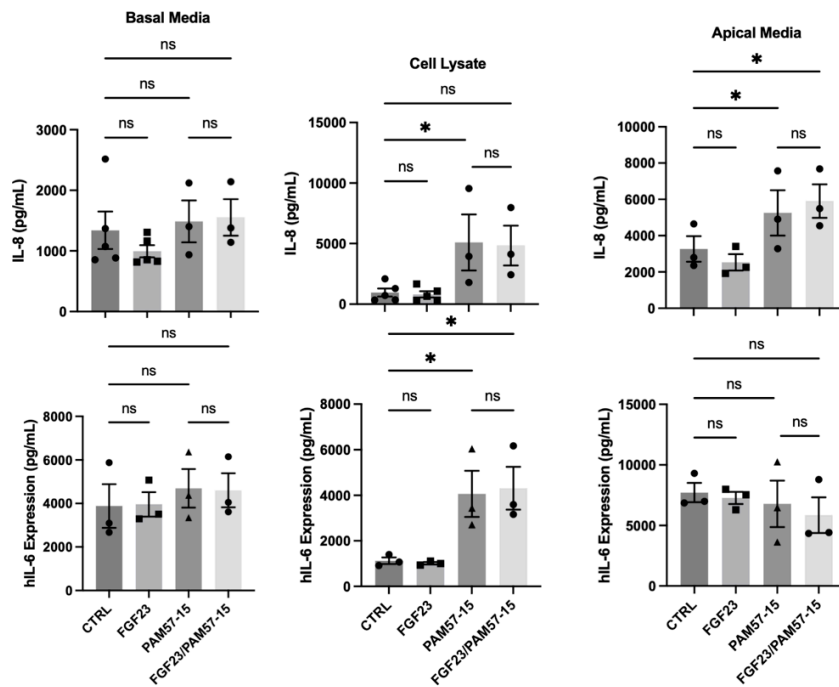

**Supplemental Figure S2.** FGF23 does not alter pro-inflammatory marker production and secretion in PA-infected 16HBEs. (a) Graph showing levels of IL-8 protein expression in the basolateral media, cell lysate, and apical media when 16HBEs are treated  $\pm$  FGF23 and  $\pm$  PA infection. (b) Graphs showing levels of IL-6 protein expression in the basolateral media, cell lysate, and apical media when 16HBEs are treated  $\pm$  FGF23 and  $\pm$  PA infection. Data was represented as expression (pg/mL) with  $n=3$  independent experiments. Statistical analysis was done using a 2-way ANOVA, followed by Tukey's multiple comparisons *post hoc* test. Data are expressed as means  $\pm$  standard error of the mean (SEM). Differences were considered statistically significant if  $*P<0.05$ .
